# Supplementary material for: Clinical outcomes and inflammatory marker levels in patients with Covid-19 and obesity at an inner-city safety net hospital
Source: PubMed Central journal article supplement (PMC7744045; doi:10.1371/journal.pone.0243888), 2020-12-16
Supplement: pone.0243888.s001.pdf [file pone.0243888.s001.pdf]

**Table S1.** Median (range) inflammatory markers and absolute lymphocyte count on hospital days 1 and 2 as well as maximum FiO2 during hospitalization by body mass index (BMI) group.

|                        | BMI < 25<br>N=186   | BMI 25-29.9<br>N=235 | BMI 30-34.9<br>N=182 | BMI 35-39.9<br>N=98 | BMI > 40<br>N=80   | p-value |
|------------------------|---------------------|----------------------|----------------------|---------------------|--------------------|---------|
| Day 1 CRP (mg/L)       | 67.9 (0.4-447.7)    | 94.6 (0.7-683.3)     | 73.0 (0.3-429.5)     | 73.5 (0.4-421.4)    | 64.1 (3.7-381.5)   | 0.060   |
| Day 2 CRP (mg/L)       | 67.2 (0.6-460.0)    | 98.7 (0.3 – 600.7)   | 84.7 (0.2-378.7)     | 74.8 (0.4-408.5)    | 68.3 (3.5-475.5)   | 0.056   |
| Day 1 LDH (U/L)        | 311 (100-2824)      | 359 (154-967)        | 361 (47-2897)        | 387 (167-921)       | 370 (153-1485)     | 0.0027  |
| Day 2 LDH (U/L)        | 297 (141-2643)      | 352 (145 – 1296)     | 345.5 (149-2507)     | 338 (175 – 879)     | 347.5 (153 – 1059) | 0.0005  |
| Day 1 Ferritin (ng/mL) | 594 (26-33,511)     | 645.5 (12-33,511)    | 519 (12 – 33,511)    | 311 (25 – 8135)     | 421 (9 – 13263)    | 0.0002  |
| Day 2 Ferritin (ng/mL) | 683 (29-33,511)     | 671 (13 – 1465)      | 519.5 (12-33,511)    | 324.5 (12- 6,174)   | 413 (13 – 10,345)  | <0.0001 |
| Day 1 D-dimer (µg/mL)  | 382.5 (150- 44,123) | 335 (150 – 16,704)   | 300 (150 – 54,550)   | 296 (150 – 48,048)  | 263 (150 – 8,206)  | 0.0249  |
| Day 2 D-dimer (µg/mL)  | 403 (150 – 10,779)  | 346 (150 – 14,027)   | 331 (150 – 15,840)   | 312 (150 – 15,840)  | 245 (150 – 51,299) | 0.0047  |
| Day 1 ALC (1000/µL)    | 1.1 (0.2-4.0)       | 1.1 (0.3-5.1)        | 1.1 (0.3-62.3)       | 1.3 (0.3-5.2)       | 1.2 (0.2-3)        | 0.0013  |
| Day 2 ALC (1000/µL)    | 1.2 (0.1 – 101.0)   | 1.1 (0.3 – 9.2)      | 1.2 (0.1 – 51.2)     | 1.4 (0.5 – 4.3)     | 1.3 (0.2 – 3.2)    | 0.0285  |
| Max FiO2               | 27% (21-100)        | 30% (21-100)         | 30% (21-100)         | 30% (21-100)        | 35.3% (21-100)     | 0.15    |

CRP = C reactive protein, LDH = lactate dehydrogenase ALC = absolute lymphocyte count
